# Supplementary material for: Characterization of Tannic Acid-Coated AZ31 Mg Alloy for Biomedical Application and Comparison with AZ91
Source: MDPI journal article supplement (doi:10.3390/ma17020343), 2024-01-10
Supplement: s1 [file s1]

### Supporting information

## Characterization of tannic acid coated AZ31 and AZ91 Mg alloys for biomedical applications

Jacopo Barberi<sup>1\*</sup>, Muhammad Saqib<sup>2</sup>, Anna Dmitruk<sup>3</sup>, Jörg Opitz<sup>2</sup>, Krzysztof Naplocha<sup>3</sup>, Natalia Beshchasna<sup>2</sup>, Silvia Spriano<sup>1</sup>, Sara Ferraris<sup>1\*</sup>

<sup>1</sup> Politecnico di Torino, Department of Applied Science and Technology, Turin, Italy; [jacopo.barberi@polito.it](mailto:jacopo.barberi@polito.it), [silvia.spriano@polito.it](mailto:silvia.spriano@polito.it), [sara.ferraris@polito.it](mailto:sara.ferraris@polito.it)

<sup>2</sup> Fraunhofer Institute for Ceramic Technologies and Systems IKTS, Dresden, Germany; [muhammad.saqib@ikts.fraunhofer.de](mailto:muhammad.saqib@ikts.fraunhofer.de), [joerg.opitz@ikts.fraunhofer.de](mailto:joerg.opitz@ikts.fraunhofer.de), [natalia.beshchasna@ikts.fraunhofer.de](mailto:natalia.beshchasna@ikts.fraunhofer.de)

<sup>3</sup> Department of Lightweight Elements Engineering, Foundry and Automation, Faculty of Mechanical Engineering, Wrocław University of Science and Technology, Wrocław, Poland; [anna.dmitruk@pwr.edu.pl](mailto:anna.dmitruk@pwr.edu.pl), [krzysztof.naplocha@pwr.edu.pl](mailto:krzysztof.naplocha@pwr.edu.pl)

\* Corresponding author: [jacopo.barberi@polito.it](mailto:jacopo.barberi@polito.it), [sara.ferraris@polito.it](mailto:sara.ferraris@polito.it); Tel.: +3901109043231

### AZ91 samples

The morphology at the macroscale of the casted samples of AZ91 is shown in Figure S1.

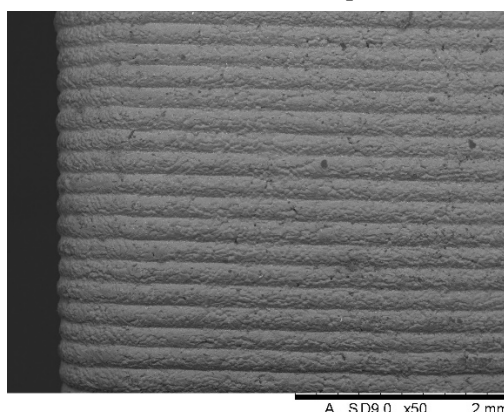

**Figure S1:** Optical picture of the AZ91 sample surface.

### AZ31 tannic acid coating characterization

The results obtained by EDS on AZ31 samples before and after coating with the two different TA solutions are reported in **Table S1**.

**Table S1:** Surface composition by EDS of AZ31 samples as received and after coating with TA solution at different concentrations.

|                  | Elemental composition (at%) |      |      |     |
|------------------|-----------------------------|------|------|-----|
|                  | C                           | O    | Mg   | Al  |
| <b>AZ31</b>      | 7.8                         | 36.1 | 54.5 | 1.6 |
| <b>AZ31TA_5</b>  | 37.3                        | 48.2 | 14   | 0.5 |
| <b>AZ31TA_20</b> | 35.6                        | 47.1 | 16.7 | 0.6 |

### Degradation studies

The chemical composition of the different AZ31 samples after degradation up to 14 d in PBS, evaluated by EDS, are reported in Table S2.

**Table S2:** Surface composition by EDS of AZ31, AZ31TA\_5, and AZ31TA\_20 after soaking in PBS solution for different time points.

|            |    | Elemental composition (at%) |      |     |      |      |      |
|------------|----|-----------------------------|------|-----|------|------|------|
| Time (day) |    | C                           | O    | Na  | Mg   | Al   | P    |
| AZ31       | 1  | 4.9                         | 54.9 | 1.6 | 33.2 | 1.4  | 4.0  |
|            | 2  | 12.3                        | 52.2 | 2.4 | 28.0 | 1.4  | 3.0  |
|            | 7  | 1.0                         | 67.6 | 2.1 | 20.4 | 0.2  | 8.6  |
|            | 14 | 7.5                         | 65.7 | 3.4 | 12.6 | 0.5  | 10.0 |
| AZ31TA_5   | 1  | 7.7                         | 52.0 | 1.3 | 34.4 | N.D. | 4.6  |
|            | 2  | 6.1                         | 63.3 | 2.3 | 21.9 | 0.4  | 5.9  |
|            | 7  | 2.5                         | 70.5 | 3.4 | 14.0 | 0.0  | 9.2  |
|            | 14 | N.D.                        | 77.9 | 0.5 | 13.6 | 0.3  | 7.7  |
| AZ31TA_20  | 1  | 3.5                         | 61.2 | 2.7 | 23.6 | 1.1  | 7.9  |
|            | 2  | 11.1                        | 59.9 | 2.2 | 19.6 | 0.5  | 6.8  |
|            | 7  | 4.2                         | 68.7 | 2.4 | 15.5 | 0.7  | 8.4  |
|            | 14 | 12.3                        | 64.2 | 2.8 | 12.4 | 0.7  | 7.7  |

### XPS peak deconvolution

The composition of the C1s, O1s and Mg1s peaks obtained by deconvolution are reported in Table S3, Table S4, and Table S5, respectively.

**Table S3:** Composition of the C1s peak (at%).

| C1s    | CC    | CO <sub>3</sub> | CO    | arC   | COO   | $\pi$ - $\pi$ /C-Mg |
|--------|-------|-----------------|-------|-------|-------|---------------------|
| AZ31   | 71.48 | 13.57           | 14.94 |       |       |                     |
| AZ31TA | 40.63 | 5.17            | 39.63 | 5.38  | 6.45  | 2.74                |
| AZ91   | 62.84 | 3.60            | 16.17 |       | 10.35 | 7.03                |
| AZ91TA | 35.89 | 0.92            | 31.05 | 15.19 | 13.89 | 3.07                |

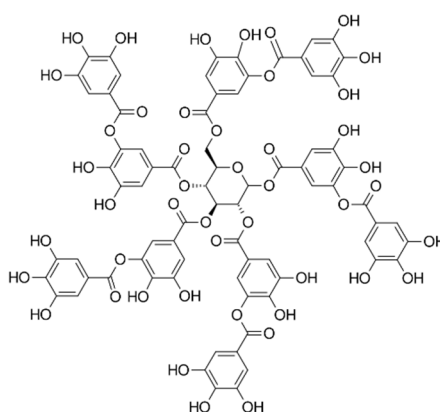**Figure S2:** Tannic acid formula.

**Table S4:** Composition of the O1s peak (at%).

| O1s    | Mg(OH) <sub>2</sub> /CO <sub>3</sub> | H <sub>2</sub> O | arOH | MgO  | COO  |
|--------|--------------------------------------|------------------|------|------|------|
| AZ31   | 67.4                                 | 7.0              |      | 25.6 |      |
| AZ31TA | 15.8                                 |                  | 32.0 | 35.5 | 14.7 |
| AZ91   | 52.9                                 | 7.3              |      | 39.8 |      |
| AZ91TA | 4.1                                  |                  | 36.8 | 38.8 | 22.3 |

**Table S5:** Composition of the Mg1s peak (at%).

| Mg1s   | MgO   | MgCO <sub>3</sub> | Mg(OH) <sub>2</sub> |
|--------|-------|-------------------|---------------------|
| AZ31   | 44.90 | 36.14             | 18.96               |
| AZ31TA | 55.55 | 30.06             | 14.39               |
| AZ91   | 39.50 | 31.50             | 29.01               |
| AZ91TA | 55.22 | 43.34             | 1.44                |
